# Supplementary material for: Synthetic torpor protects rats from exposure to accelerated heavy ions
Source: Springer Nature journal article supplement (doi:10.1038/s41598-022-20382-6), 2022-09-30

**Supplementary Figure 1.**  
**PAS staining**

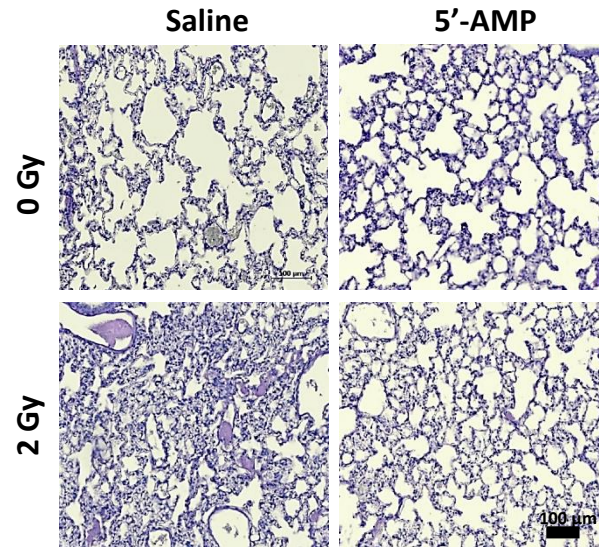

Supplement: MOESM1 [file 41598_2022_20382_MOESM1_ESM%20%281%29.pdf]
